# Supplementary material for: Barriers and Facilitators to Health Behavior Change: Perspectives of Individuals with Serious Mental Illness in Health-Promoting Interventions – A Systematic Review of Qualitative Evidence
Source: Research Square preprint supplement (doi:10.21203/rs.3.rs-4793963/v1), 2026-01-29
Supplement: Supplementary file 2 [file e2b7fb579749ec9ad71e4eab.docx]

**Medline**

(MH "Depression") OR (MH "Depressive Disorder, Major") OR (MH "Depressive Disorder") OR (MH "Bipolar Disorder") OR (MH "Mental Disorders") OR "mental illness" OR (MH "Schizophrenia") OR (MH "Personality Disorders+") OR (MH "Anxiety Disorders") OR (MH "Schizotypal Personality Disorder")

AND

(MM "Exercise") OR "exercise" OR (MH "Exercise Therapy") OR (MH "Motor Activity") OR "motor activity" OR (MH "Resistance Training") OR (MH "Muscle Stretching Exercises") OR (MM "Diet Therapy") OR (MH "Diet, Reducing") OR (MH "Weight Loss") OR (MH "Weight Reduction Programs") OR (MH "Diet, Healthy") OR (MH "Healthy Lifestyle") OR (MM "Health Promotion")

AND

(MH "Treatment Refusal") OR (MH "Patient Compliance") OR "adherence" OR barriers OR facilitators OR enabl* OR adherence OR promot*

**PsycINFO**

DE "Serious Mental Illness" OR MM "Mental Disorders" OR DE "Schizophrenia" OR DE "Anxiety Disorders" OR DE "Major Depression" OR DE "Bipolar Disorder" OR DE "Borderline Personality Disorder"

AND

DE "Physical Activity" OR DE "Physical Fitness" OR DE "Activity Level" OR DE "Actigraphy" OR DE "Active Living" OR DE "Exercise" OR DE "Aerobic Exercise" OR DE "Dietary Treatment" OR DE "Diets" OR DE "Healthy Eating" OR DE "Obesity" OR ""Dietary Intervention*" OR "Physical Health" OR exercis*

AND

DE "Treatment Refusal" OR DE "Treatment Barriers" OR DE "Treatment Compliance" OR DE "Client Participation" OR DE "Client Attitudes" OR barriers OR facilitators" OR enabl* OR promot*

**Social Science Citation Index**

"mental illness" OR "mental disorders" OR Depression OR Schizophrenia OR "personality disorders")

AND

("Physical Health" OR Exercise OR "Exercise Therapy" OR "Motor activity" OR "Resistance Training" OR "Muscle Stretching Training" OR "Aerobic Exercise" OR "Healthy Eating" OR "Diet Therapy" OR "Weight Loss" OR "Weigth Reduction Programs" OR "Healthy lifestyle")

AND

(Treatment Refusal" OR "Patient Compliance" OR adherence OR facilitators OR barriers OR enabl* OR promot* OR "Client participation"

**CINAHL**

(MH "Depression") OR (MH "Depressive Disorder, Major") OR (MH "Depressive Disorder") OR (MH "Bipolar Disorder") OR (MH "Mental Disorders") OR "mental illness" OR (MH "Schizophrenia") OR (MH "Personality Disorders+") OR (MH "Anxiety Disorders") OR (MH "Schizotypal Personality Disorder")

AND

(MM "Exercise") OR "exercise" OR (MH "Exercise Therapy") OR (MH "Motor Activity") OR "motor activity" OR (MH "Resistance Training") OR (MH "Muscle Stretching Exercises") OR (MM "Diet Therapy") OR (MH "Diet, Reducing") OR (MH "Weight Loss") OR (MH "Weight Reduction Programs") OR (MH "Diet, Healthy") OR (MH "Healthy Lifestyle") OR (MM "Health Promotion") OR "Dietary Intervention

AND

(MH "Treatment Refusal") OR (MH "Patient Compliance") OR "adherence" OR "barriers" OR ">facilitators" OR "client attitudes" OR "treatment compliance" OR "Client participation"

**PH-Katalog plus**

Alle Felder:"serious mental illness" "physical health" (facilitator* OR promot*)

**Google scholar**

"serious mental illness" "physical health" (facilitator* OR promot*) (first 20 matches only)
